# Supplementary material
Source: PubMed Central journal article supplement (PMC7536758)
Supplement: CJN.04080320SupplementaryData.pdf [file CJN.04080320SupplementaryData.pdf]

**Supplemental Material:**

Supplemental Table 1. Associations of low birth weight, small for gestational age or preterm birth with chronic kidney disease stage 3, 4 or 5.

Supplemental Table 2. Associations of low birth weight, small for gestational age or preterm birth with diverse forms of kidney disease. Analyses for cohort born before 1990.

**Supplemental table 1. Associations of low birth weight, small for gestational age or preterm birth with chronic kidney disease stage 3, 4 or 5.**

| Exposure                                  |     | CKD stage 3 |                  | CKD Stage 4 |                  | CKD stage 5 |                  |
|-------------------------------------------|-----|-------------|------------------|-------------|------------------|-------------|------------------|
|                                           |     | N           | OR (95% CI)      | N           | OR(95% CI)       | N           | OR (95% CI)      |
| Birth weight <10 <sup>th</sup> percentile | No  | 1501        | 1.0 (ref)        | 809         | 1.0 (ref)        | 722         | 1.0 (ref)        |
|                                           | Yes | 304         | 1.80 (1.60-2.05) | 167         | 1.84 (1.56-2.18) | 152         | 1.88 (1.58-2.24) |
| Z-score <10 <sup>th</sup> percentile      | No  | 1415        | 1.0 (ref)        | 763         | 1.0 (ref)        | 694         | 1.0 (ref)        |
|                                           | Yes | 297         | 1.89 (1.67-2.14) | 173         | 2.04 (1.73-2.41) | 137         | 1.78 (1.48-2.13) |
| Preterm birth                             | No  | 1676        | 1.0 (ref)        | 913         | 1.0 (ref)        | 823         | 1.0 (ref)        |
|                                           | Yes | 133         | 1.65 (1.38-1.97) | 70          | 1.59 (1.25-2.03) | 57          | 1.44 (1.10-1.88) |
| Birth weight < 2.5 kg                     | No  | 1692        | 1.0 (ref)        | 927         | 1.0 (ref)        | 827         | 1.0 (ref)        |
|                                           | Yes | 117         | 2.09 (1.73-2.52) | 56          | 1.82 (1.39-2.38) | 53          | 1.93 (1.46-2.55) |

**Supplemental Table 2. Associations of low birth weight, small for gestational age or preterm birth with diverse forms of kidney disease. Analyses for cohort born before 1990.**

| Exposure                                        | Chronic kidney disease |               | Acute kidney injury |               | Glomerulonephritis |               | Hereditary kidney disease |               | Malformations of the kidney or urinary tract |               |                 |
|-------------------------------------------------|------------------------|---------------|---------------------|---------------|--------------------|---------------|---------------------------|---------------|----------------------------------------------|---------------|-----------------|
|                                                 | N                      | aOR (95% CI)* | N                   | aOR (95% CI)* | N                  | aOR (95% CI)* | N                         | aOR (95% CI)* | N                                            | aOR (95% CI)* |                 |
| Birth weight <10 <sup>th</sup> percentile – LBW | No                     | 3095          | 1.0 (ref)           | 3085          | 1.0(ref)           | 2362          | 1.0(ref)                  | 631           | 1.0(ref)                                     | 560           | 1.0(ref)        |
|                                                 | Yes                    | 582           | 1.58 (1.45-1.73)    | 524           | 1.43(1.30-1.57)    | 341           | 1.23(1.10-1.38)           | 93            | 1.23 (0.99-1.54)                             | 78            | 1.17(0.92-1.50) |
| Z-score <10 <sup>th</sup> percentile - SGA      | No                     | 2907          | 1.0 (ref)           | 2879          | 1.0(ref)           | 2204          | 1.0(ref)                  | 594           | 1.0(ref)                                     | 524           | 1.0(ref)        |
|                                                 | Yes                    | 602           | 1.51 (1.40-1.65)    | 556           | 1.41(1.30-1.55)    | 361           | 1.22(1.10-1.36)           | 108           | 1.33 (1.10-1.64)                             | 83            | 1.16(0.92-1.50) |
| Preterm birth                                   | No                     | 3471          | 1.0(ref)            | 3418          | 1.0(ref)           | 2580          | 1.0(ref)                  | 693           | 1.0(ref)                                     | 614           | 1.0(ref)        |
|                                                 | Yes                    | 241           | 1.38(1.17-1.55)     | 197           | 1.25(1.10-1.45)    | 125           | 1.10(0.90-1.30)           | 38            | 1.22(0.88-1.70)                              | 26            | 0.96(0.66-1.42) |
| Birth weight < 2.5 kg                           | No                     | 3483          | 1.0(ref)            | 3446          | 1.0(ref)           | 2594          | 1.0(ref)                  | 705           | 1.0(ref)                                     | 613           | 1.0(ref)        |
|                                                 | Yes                    | 202           | 1.80(1.55-2.07)     | 169           | 1.51(1.30-1.78)    | 111           | 1.32(1.09-1.60)           | 26            | 1.15(0.75-1.65)                              | 27            | 1.28(0.87-2.00) |

\*Adjusted for gender, maternal disease (defines as maternal diabetes mellitus, kidney disease, rheumatic disease or essential hypertension diagnosed before pregnancy), maternal marital status and malformations in the newborn.
